# Supplementary material for: Public Engagement in Digital Recommendations for Promoting Healthy Parental Behaviours from Preconception through the First 1000 Days
Source: MDPI journal article supplement (doi:10.3390/ijerph20021329), 2023-01-11
Supplement: s1 [file s1]

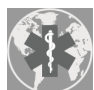

## Supplementary materials

**Table S1.** Link to some of the videos (one per topic).

| Topic             | Title                                         | Link                                                                  |
|-------------------|-----------------------------------------------|-----------------------------------------------------------------------|
| Nutrition         | The optimal pre-pregnancy diet                | <a href="https://vimeo.com/420993820">https://vimeo.com/420993820</a> |
| Breastfeeding     | Breastfeeding: a good start                   | <a href="https://vimeo.com/344058099">https://vimeo.com/344058099</a> |
| Physical Activity | Physical activity: when to start              | <a href="https://vimeo.com/344042663">https://vimeo.com/344042663</a> |
| Smoke and Alcohol | Risks of alcohol during pregnancy             | <a href="https://vimeo.com/420995071">https://vimeo.com/420995071</a> |
| Drugs             | Folic acid in pregnancy                       | <a href="https://vimeo.com/402472298">https://vimeo.com/402472298</a> |
| Child health      | National Vaccinal Prevention Plan: what it is | <a href="https://vimeo.com/467712757">https://vimeo.com/467712757</a> |
| Father health     | Male fertility: risks of smoking and alcohol  | <a href="https://vimeo.com/363756711">https://vimeo.com/363756711</a> |

**Table S2.** Characteristics of the reference group: No child/child>2y/No pregnancy/No planning a pregnancy (n=111, age range 20-66 years).

| <i>Characteristics</i>                                                                                                                        | <i>n (%)</i>       |
|-----------------------------------------------------------------------------------------------------------------------------------------------|--------------------|
| <i>Nationality (Italian)</i>                                                                                                                  | 106 (95.5)         |
| <i>Gender (female)</i>                                                                                                                        | 102 (91.9)         |
| <i>Age (median, IQR)</i>                                                                                                                      | 39.0 (31.0 - 47.0) |
| <i>Age group</i>                                                                                                                              |                    |
| ≤30 y                                                                                                                                         | 26 (23.4)          |
| 31-35 y                                                                                                                                       | 18 (16.2)          |
| 36-40 y                                                                                                                                       | 17 (15.3)          |
| 41-45 y                                                                                                                                       | 19 (17.2)          |
| >45 y                                                                                                                                         | 31 (27.9)          |
| <i>Region</i>                                                                                                                                 |                    |
| Northern Italy                                                                                                                                | 43 (38.7)          |
| Centre Italy                                                                                                                                  | 47 (42.3)          |
| Southern Italy and Islands                                                                                                                    | 21 (18.9)          |
| <i>Civil status</i>                                                                                                                           |                    |
| Unmarried                                                                                                                                     | 34 (30.6)          |
| Married                                                                                                                                       | 56 (50.5)          |
| Living together                                                                                                                               | 15 (13.5)          |
| Divorced                                                                                                                                      | 6 (5.4)            |
| <i>Educational level</i>                                                                                                                      |                    |
| Secondary school degree or less                                                                                                               | 5 (4.5)            |
| High school degree                                                                                                                            | 21 (18.9)          |
| Graduate school degree                                                                                                                        | 85 (76.6)          |
| <i>Occupation</i>                                                                                                                             |                    |
| Full-time professional                                                                                                                        | 77 (69.4)          |
| Part-time professional                                                                                                                        | 15 (13.5)          |
| Unemployed                                                                                                                                    | 19 (17.1)          |
| Health professional (yes)                                                                                                                     | 69 (75.0)          |
| <i>Values are expressed as number and percentage (n (%)) for categorical variables and median and IQR (M (IQR)) for continuous variables.</i> |                    |

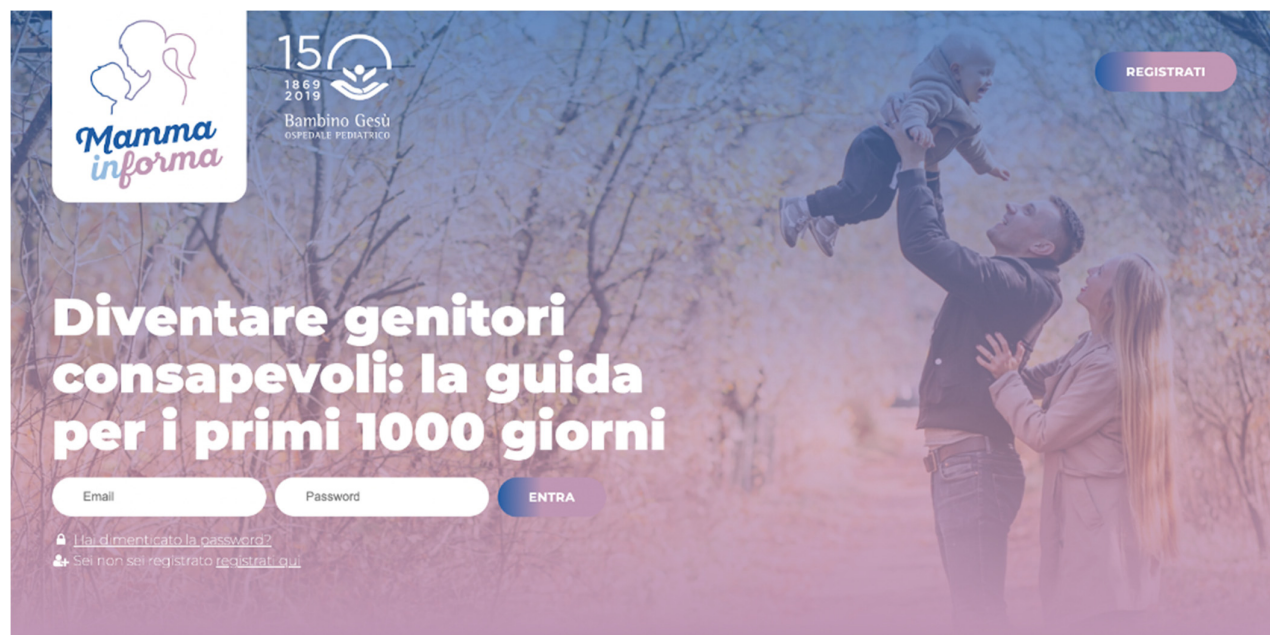

(a)

**Registrazione**

Email  Conferma email

Password  Conferma password

Gentile Signora/Egregio Signore,  
l'Ospedale Pediatrico Bambino Gesù Le fornisce le informazioni di seguito riportate relative al trattamento dei Suoi dati personali.

**Perché leggere questa informativa?**  
L'Ospedale utilizzerà le informazioni che Lei ha il diritto di essere informato/a su quali siano queste informazioni, per quali scopi verranno utilizzate, a chi potranno essere comunicate etc.

**Chi è il Titolare del trattamento dei Suoi dati personali?**  
Il Titolare del trattamento dei Suoi dati è l'Ospedale Pediatrico Bambino Gesù, con sede legale in P.zza S. Onofrio 4, 00165 Roma, codice fiscale 80403930581.

**Chi è il Responsabile del trattamento?**

Consapevole di quanto prescritto dagli art. 76 e 73 del D.P.R. 28 Dicembre 2000, n. 445, sulle sanzioni penali per le ipotesi di falsità in atti e dichiarazioni mendaci.

**ACCONSENTO AL TRATTAMENTO DEI DATI PERSONALI PER LE SEGUENTI FINALITÀ**  
Attività legate all'utilizzo del sito web ed eventuali attività di ricerca futura

Sono consapevole che prestando il consenso per le attività di diagnosi e cura l'Ospedale potrà utilizzare i dati anche per le altre finalità indicate nell'informativa quali migliorare l'organizzazione dell'Ospedale e i servizi da questo resi, ricerca scientifica e statistica, adempiere ad obblighi di legge e tutelare legittimi interessi dell'Ospedale medesimo.

☐ Con la presente dichiaro di aver ricevuto e compreso l'[informativa](#) e di aver espresso liberamente il mio consenso al trattamento.

(b)

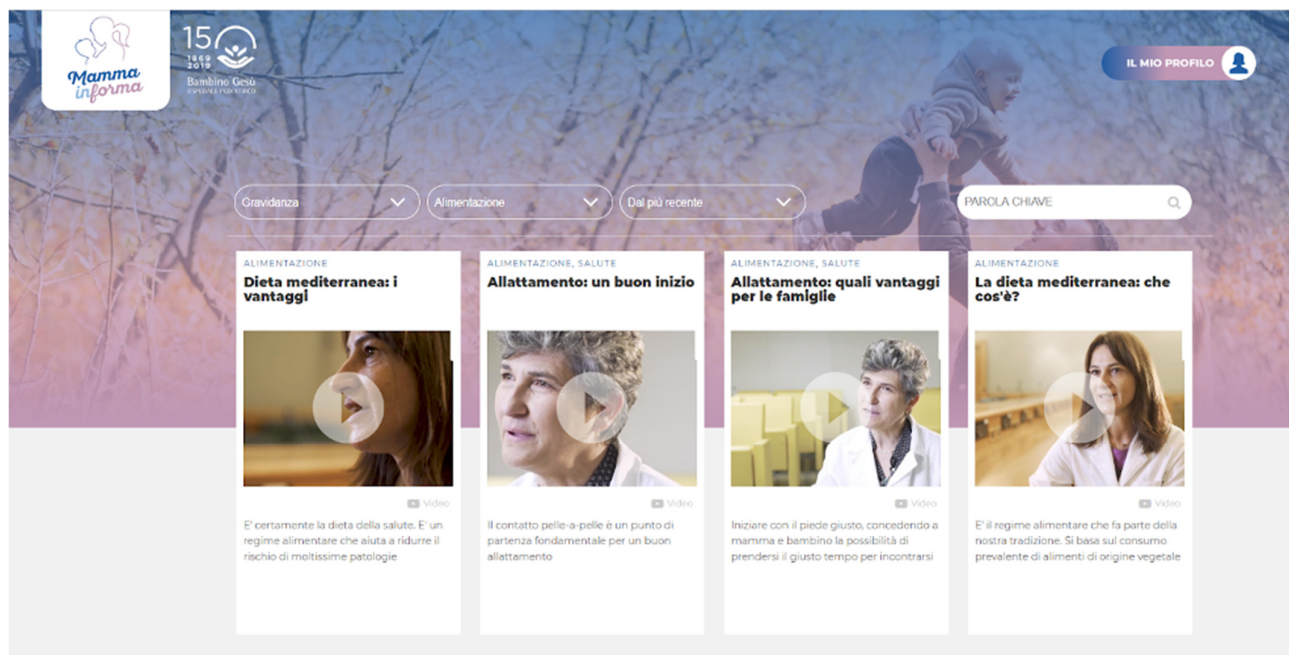

(c)

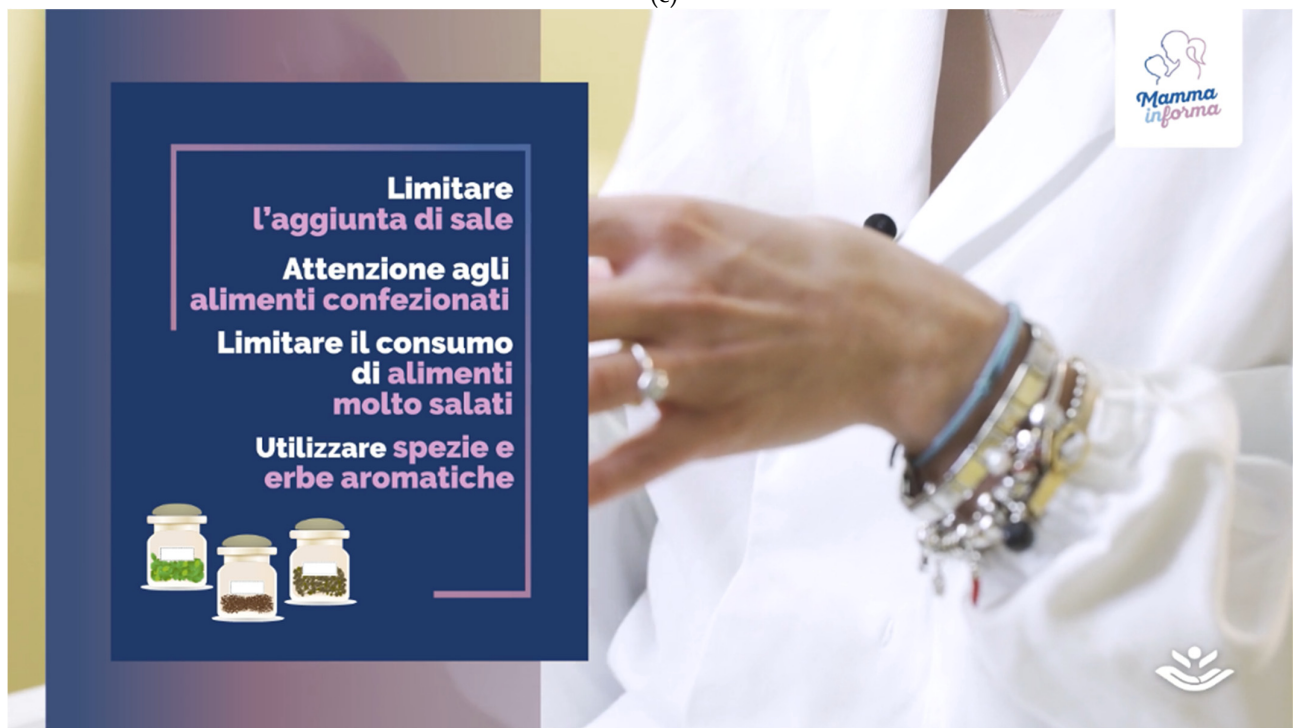

(d)

**Figure S1.** (a) Website's landing page; (b) Website's registration and consent form page; (c) Website's homepage; (d) Screenshot from one of the video interviews with graphics.

**Table S3.** Health Literacy Score's construction and percentage of answers for each question (n=1299).

|                                                                                                                                                                                                  | Score | n (%)      |
|--------------------------------------------------------------------------------------------------------------------------------------------------------------------------------------------------|-------|------------|
| <b>How often is it difficult for you to understand written information about your health status (the content not the calligraphy)?</b>                                                           |       |            |
| Always                                                                                                                                                                                           | 1     | 15 (1.2)   |
| Often                                                                                                                                                                                            | 2     | 110 (8.5)  |
| Sometimes                                                                                                                                                                                        | 3     | 451 (34.7) |
|                                                                                                                                                                                                  | 4     | 478 (36.8) |
| Rarely                                                                                                                                                                                           | 5     | 245 (18.9) |
| Never                                                                                                                                                                                            |       |            |
| <b>How often do you need someone (a relative, a friend or someone else) helping you to read medical stuff (e.g. medical or clinical documentation, informed consent forms..)?</b>                |       |            |
| Always                                                                                                                                                                                           | 1     | 82 (6.3)   |
| Often                                                                                                                                                                                            | 2     | 131 (10.1) |
|                                                                                                                                                                                                  | 3     | 285 (21.9) |
| Sometimes                                                                                                                                                                                        | 4     | 343 (26.4) |
| Rarely                                                                                                                                                                                           | 5     | 458 (35.3) |
| Never                                                                                                                                                                                            |       |            |
| Rarely                                                                                                                                                                                           | 4     | 478 (36.8) |
|                                                                                                                                                                                                  |       |            |
| <b>How confident are you filling out medical forms by yourself (e.g. declaration of not being pregnant before a radiography, detection of the presence of allergies before a vaccination..)?</b> |       |            |
| Extremely                                                                                                                                                                                        | 5     | 292 (22.5) |
|                                                                                                                                                                                                  | 4     | 450 (34.6) |
| Quite a bit                                                                                                                                                                                      | 3     | 366 (28.2) |
| Somewhat                                                                                                                                                                                         | 2     | 133 (10.2) |
| A little bit                                                                                                                                                                                     | 1     | 58 (4.5)   |
| Not at all                                                                                                                                                                                       |       |            |
| <b>In general, how much is it easy or difficult for you to understand the results from medical statistical investigations?</b>                                                                   |       |            |
| Very easy                                                                                                                                                                                        | 4     | 235 (18.1) |
|                                                                                                                                                                                                  | 3     | 878 (67.6) |
| Easy                                                                                                                                                                                             | 2     | 181 (13.9) |
| Difficult                                                                                                                                                                                        | 1     | 5 (0.4)    |
| Very difficult                                                                                                                                                                                   |       |            |
| <b>How much do you agree or disagree about this sentence? "In general, I rely upon numbers and statistics to make decisions about my health."</b>                                                |       |            |
| Strongly agree                                                                                                                                                                                   | 4     | 99 (7.6)   |

|                                                                                                   |   |               |
|---------------------------------------------------------------------------------------------------|---|---------------|
| Agree                                                                                             | 3 | 726<br>(55.9) |
| Disagree                                                                                          | 2 | 367<br>(28.3) |
| Strongly disagree                                                                                 | 1 | 107 (8.2)     |
| <b>Using information that your physician gives to you to make decisions about your pathology?</b> |   |               |
| Very easy                                                                                         | 4 | 248<br>(19.1) |
| Easy                                                                                              | 3 | 932<br>(71.7) |
| Difficult                                                                                         | 2 | 115 (8.9)     |
| Very difficult                                                                                    | 1 | 4 (0.3)       |

Values are expressed as number and percentage (n (%)) for categorical variables.

**Table S4.** Association between users' characteristics and videos' topic.

|                                                           | Nutrition        | Breastfeeding           | Physical activity | Smoke, alcohol and recreational drugs | Pharmaceuticals  | Child health            | Paternal health  |
|-----------------------------------------------------------|------------------|-------------------------|-------------------|---------------------------------------|------------------|-------------------------|------------------|
| Age (Ref:<31)                                             |                  |                         |                   |                                       |                  |                         |                  |
| 31-25                                                     | 1.81 (0.57-2.46) | 0.73 (0.53-1.52)        | 0.97 (0.42-2.25)  | 1.10 (0.53-2.29)                      | 1.11 (0.41-2.97) | 1.08 (0.52-2.26)        | 1.16 (0.60-2.23) |
| 36-40                                                     | 0.76 (0.35-1.62) | 0.55 (0.25-1.19)        | 0.70 (0.29-1.69)  | 1.53 (0.73-3-21)                      | 0.79 (0.28-2.24) | 1.65 (0.77-3.55)        | 0.75 (0.38-1.50) |
| >40                                                       | 1.23 (0.51-2.97) | 0.55 (0.22-1.38)        | 0.62 (0.22-1.77)  | 1.45 (0.60-3.54)                      | 0.94 (0.28-3.20) | <b>2.71 (1.09-6.70)</b> | 1.11 (0.51-2.39) |
| Region (Ref:North)                                        |                  |                         |                   |                                       |                  |                         |                  |
| Center                                                    | 0.67 (0.38-1.20) | 0.66 (0.37-1.19)        | 0.56 (0.29-1.11)  | 1.05 (0.61-1.82)                      | 0.75 (0.34-1.63) | 1.18 (0.67-2.08)        | 1.38 (0.84-2.27) |
| South                                                     | 0.93 (0.45-1.83) | <b>0.45 (0.21-0.95)</b> | 0.51 (0.22-1.19)  | 0.85 (0.41-1.73)                      | 0.62 (0.23-1.63) | 1.03 (0.52-2.06)        | 0.98 (0.50-1.91) |
| Educational Level (Ref:Lower than Graduate School degree) |                  |                         |                   |                                       |                  |                         |                  |
| Graduate School degree                                    | 1.10 (0.59-2.00) | 1.21 0.65-2.27          | 1.93 (0.92-4.06)  | 1.01 (0.57-1.79)                      | 0.57 (0.26-1.38) | 1.21 (0.66-2.21)        | 1.15 (0.65-2.01) |
| Civil status (Ref:Unmarried)                              |                  |                         |                   |                                       |                  |                         |                  |
| Married                                                   | 0.58 (0.27-1.25) | 0.91 (0.41-2.04)        | 0.50 (0.21-1.23)  | 0.69 (0.34-1.41)                      | 1.82 (0.60-5.58) | 1.35 (0.61-2.97)        | 0.58 (0.32-1.06) |

|                                          |                  |                  |                         |                  |                         |                         |                         |
|------------------------------------------|------------------|------------------|-------------------------|------------------|-------------------------|-------------------------|-------------------------|
| Living together                          | 0.65 (0.28-1.51) | 1.52 (0.63-3.64) | 0.65 (0.25-1.72)        | 1.23 (0.59-2.58) | 2.13 (0.63-7.19)        | 1.40 (0.59-3.31)        | <b>0.46 (0.23-0.91)</b> |
| Divorced                                 | 0.72 (0.06-8.61) | 6.53 (0.61-70.0) | 0.77 (0.04-14.88)       | 1.67 (0.33-8.48) | 11.43 (0.46-286.71)     | 0.84 (0.07-10.40)       | 0.60 (0.07-5.08)        |
| Occupation (Ref: Full-time professional) |                  |                  |                         |                  |                         |                         |                         |
| Part-time professional                   | 0.90 (0.45-1.80) | 1.06 (0.52-2.18) | 0.89 (0.39-2.00)        | 1.31 (0.71-2.44) | 1.50 (0.58-3.85)        | 1.18 (0.59-2.35)        | 0.93 (0.47-1.85)        |
| Unemployed                               | 0.68 (0.33-1.41) | 1.10 (0.53-2.27) | <b>0.37 (0.15-0.91)</b> | 1.01 (0.50-2.05) | 1.47 (0.55-3.92)        | 1.69 (0.84-3.40)        | 0.90 (0.43-1.88)        |
| Health professional (Ref:No)             | 1.07 (0.56-2.03) | 0.79 (0.40-1.56) | 0.89 (0.42-1.87)        | 0.77 (0.39-1.52) | <b>3.46 (1.40-8.54)</b> | 0.75 (0.39-1.44)        | 1.20 (0.71-2.03)        |
| HL (Ref:Low)                             |                  |                  |                         |                  |                         |                         |                         |
| Medium                                   | 0.90 (0.50-1.63) | 1.43 (0.77-2.63) | 0.87 (0.44-1.74)        | 1.20 (0.67-2.13) | 1.41 (0.62-3.18)        | <b>2.05 (1.12-3.75)</b> | 1.53 (0.85-2.77)        |
| High                                     | 1.20 (0.64-2.27) | 1.60 (0.83-3.12) | 1.00 (0.48-2.10)        | 1.04 (0.56-1.92) | 1.30 (0.54-3.14)        | 1.59 (0.84-3.02)        | 1.60 (0.89-2.89)        |

Multilevel logistic regression model. The model is also adjusted for period. Values are expressed as Odd Ratio and 95% Confidence Interval (OR (CI 95%)). Statistical significance for  $p < 0.05$  (in bold).
